# Supplementary material
Source: publisher figshare collection journal article supplement (https://tandf.figshare.com/ndownloader/files/15142937)
Supplement: Supplementary file 1 [file 15142937]

**Supplemental Information**

**Figure S1:** Translocation factor for *F. esculentum* cultivars in Eglantiers (A) vs. Oblates soil (B) under laboratory conditions, with application of CA at 5 and 50 mmol kg-1 one week before harvest. Letters denote homogenous groups according to the ANOVA protocol

**Table S1:** Physico-chemical characteristics of soils from both the "Eglantiers" and "Oblates" sites. Analyses were performed by the SADEF (France) and INRA (Arras, France) laboratories, both accredited by France's National Accreditation Authority (COFRAC).

|  | Clay (%) | Sand (%) | Silt (%) | pH | CEC Metson  (meq/100g) | Average total Pb (mg kg-1) | Organic C (%) | C/N ratio |
| --- | --- | --- | --- | --- | --- | --- | --- | --- |
| Eglantiers | 14.0 | 57.4 | 28.4 | 7.3 | 8.7 | 170 | 2.1 | 14.0 |
| Oblates | 9.5 | 70.0 | 20.4 | 6.6 | 12.9 | 171 | 3.7 | 14.4 |

**Table S2:** Comparison of soil pH between field and laboratory conditions, at the end of each experiment, with or without *F. esculentum* cultivars and with or without citric acid (CA) at both sites (Eglantiers and Oblates). Letters denote homogenous groups according to the ANOVA protocol.

| pH |  | Eglantiers | | | Oblates | | |
| --- | --- | --- | --- | --- | --- | --- | --- |
|  | CA (mmol kg-1) | 0 | 5 | 50 | 0 | 5 | 50 |
| Field | No plants | 7.40a |  |  |  |  |  |
| La Harpe | 7.36a | 7.42a | - | - | - | - |
| Laboratory | No plants | 7.34a | 7.54a | 4.65b | 6.64a’ | 6.69a’ | 4.12b’ |
| PI 647646 | 7.61a | 7.53a | 4.97b | 6.48a’ | 6.47a’ | 4.54b’ |
| PI 590988 | 7.52a | 7.47a | 4.78b | 6.51a’ | 6.51a’ | 4.14b’ |
| PI 590989 | 7.49a | 7.47a | 4.74b | 6.54a’ | 6.39a’ | 4.42b’ |
| La Harpe | 7.64a | 7.63a | 4.87b | 6.62a’ | 6.53a’ | 4.65b’ |
